# Supplementary material for: Studies on varying n-alkanethiol chain lengths on a gold coated surface and their effect on antibody–antigen binding efficiency
Source: Royal Society of Chemistry journal article supplement (doi:10.1039/c5ra11725a), 2015-01-01
Supplement: c5ra11725a1.pdf [file c5ra11725a1.pdf]

## Electronic Supplementary Information (ESI): Studies on varying n-alkanethiol chain lengths on gold coated surface and their effect on antibody-antigen binding efficiency

P. Bhadra, M. S. Shajahan, E. Bhattacharya, A. Chadha

### I. AFM Micrograph

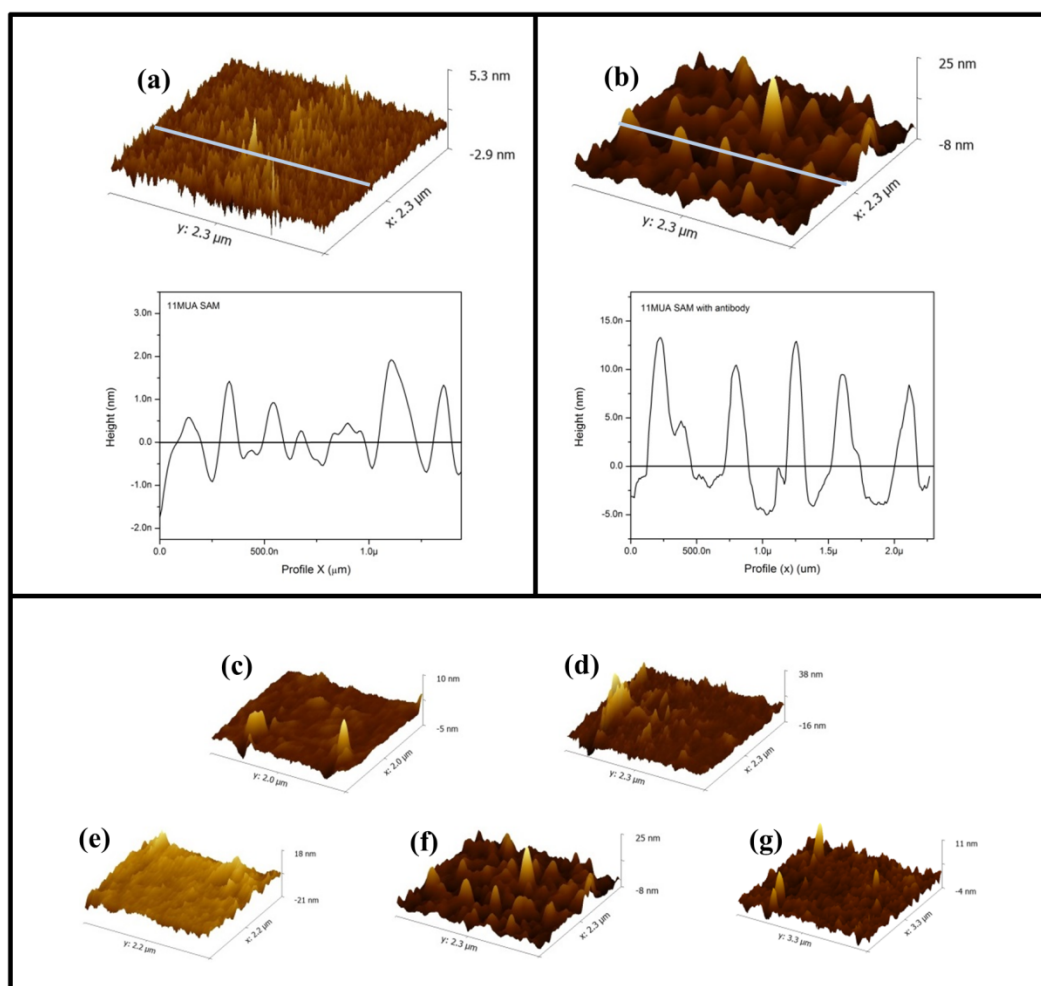

**Fig. 1.** 3D AFM images with extracted height histograms of (a) 11MUA SAM surface (b) Antibody immobilized on 11MUA SAM surface. 3D AFM of (c) TGA (d) 3MPA (e) 6MHA (f) 11MUA (g) 16MHDA.
